# Supplementary material
Source: PubMed Central journal article supplement (PMC4121845)
Supplement: 1411413111_pnas.201411413SI.pdf [file 1411413111_pnas.201411413SI.pdf]

# Supporting Information

Grosse et al. 10.1073/pnas.1411413111

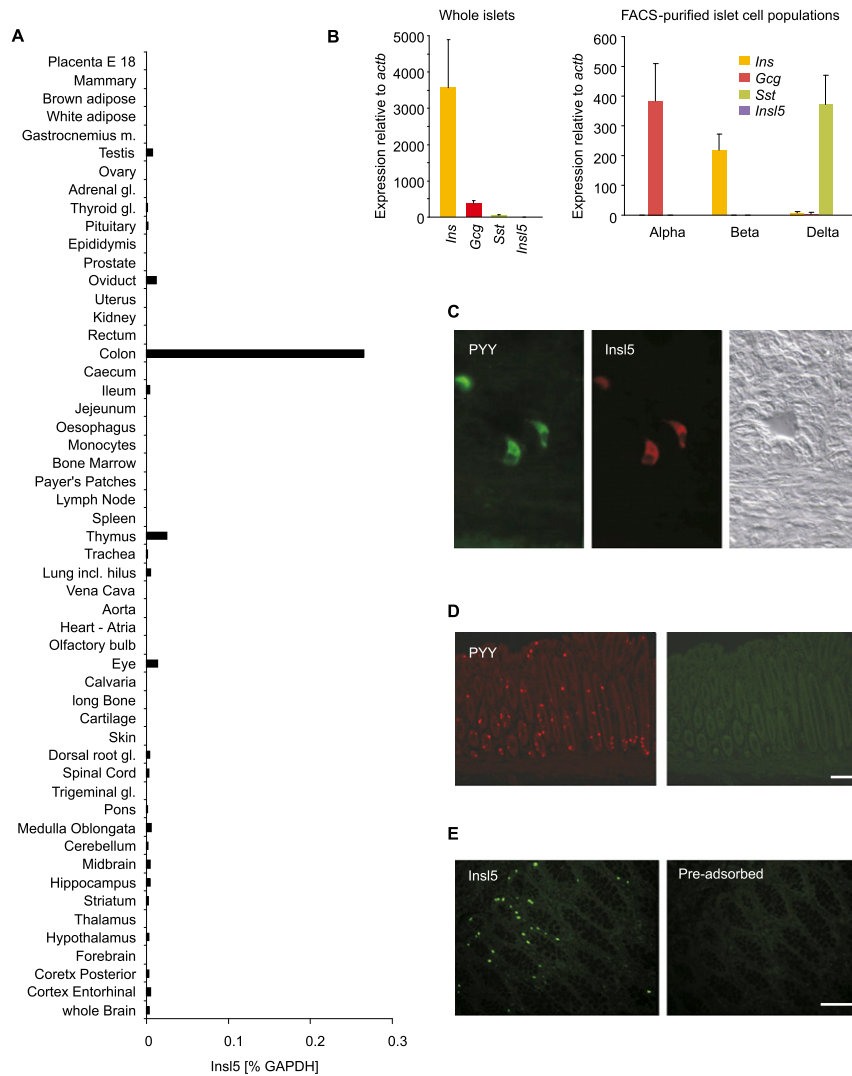

**Fig. S1.** Expression of insulin-like peptide 5 (*Insl5*) in a range of mouse tissues and cells. (A) *Insl5* mRNA was quantified by quantitative RT-PCR (qRT-PCR) in a range of mouse tissues. (B) Detailed expression analysis of *insl5*, *gcg*, insulin (*ins*), and somatostatin (*sst*) in pancreatic endocrine cells. Taqman qRT-PCR analysis was performed on whole mouse islets or from FACS-purified murine pancreatic alpha, beta, and delta cells. Alpha and beta cells were purified from GLU-Venus mice, as described (1). Delta cells were purified from *Sst-Cre* × *ROSA26-EYFP* mice. *b-actin* (*Actb*) was used as a housekeeper. Columns show mean + 1 SEM. (C) Colocalization of PYY (Left) and *Insl5* (Center) in mouse colon. (C, Right) Differential interference contrast. (D) Immunohistochemistry controls for the specificity of the *Insl5* signal. *Insl5* antibody was omitted but not the secondary antibody (green channel, Right). PYY was detected as described (red, Left). There was no cross-channel contamination observed and no nonspecific signal arising from the secondary anti-rat antibody in the green channel. (Scale bar: 100  $\mu$ m.) (E) *Insl5* is detected using hybridoma clone NSFL7-18H1 at a dilution of 1:5,000 (Left). In an adjacent section no specific signal was detected after preadsorption of a 1:1,000 dilution with 0.5  $\mu$ g/mL *Insl5* (Right). (Scale bar: 100  $\mu$ m.)

1. Reimann F, et al. (2008) Glucose sensing in L cells: A primary cell study. *Cell Metab* 8(6):532–539.

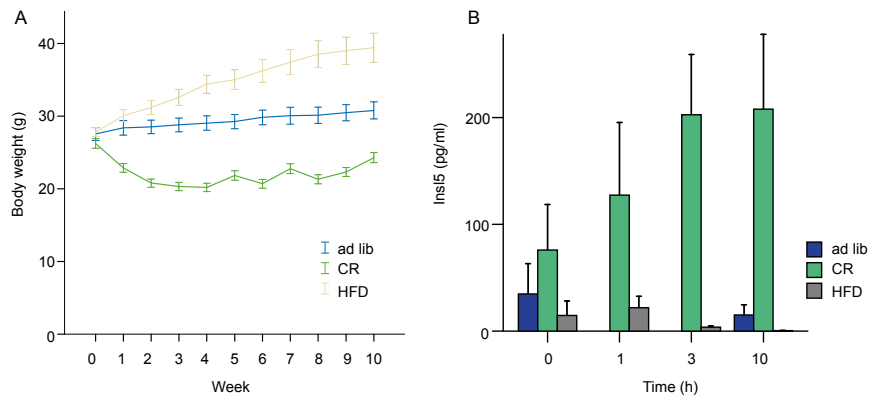

**Fig. S2.** Plasma InsI5 levels after dietary intervention. (A and B) Effect of long-term dietary alterations on InsI5 levels. C57BL/6J mice were fed with standard chow ad libitum (ad lib) or restricted to 60% of the former (calorie restriction; CR), or with a high-fat diet (HFD, 45% fat) for 10 wk. (A) Body weight changed as expected in the cohorts, represented as mean  $\pm$  95% CI. (B) After an overnight fast, terminal blood samples were taken before or at the indicated time after refeeding. InsI5 levels were higher in the CR cohort (ANOVA with time and diet as factors;  $P < 0.001$ ; post hoc Bonferroni:  $P < 0.001$  for CR vs. HFD. Ad libitum cohort was not included in the analysis as only two time points were measured for this cohort.  $n \geq 7$  for each time point, diet and genotype, respectively (mean  $\pm$  SEM).

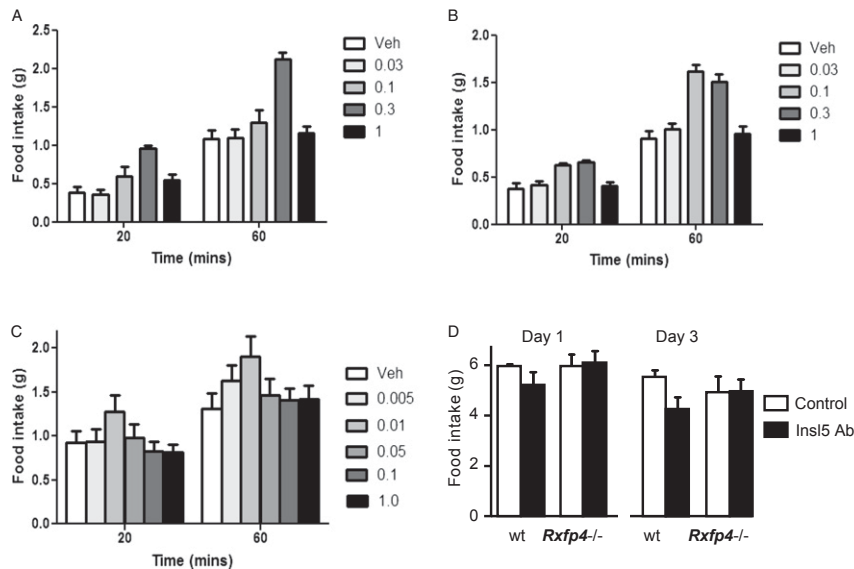

**Fig. S3.** Effect of InsI5 on food intake in mice. (A) Animals were adapted to a palatable wet mash meal (made from chow diet) at a fixed time of day. Commercial InsI5 (Phoenix Pharmaceuticals), at the doses indicated, was injected and food intake was monitored. Information about the nature of the C terminus (acidic or amide) of InsI5 purchased from Phoenix Pharmaceuticals was not available. (B) As in A, using a synthetic InsI5 preparation with free C-terminal acid, which is substantially more potent than the amide form in vitro (1). (C) Consumption of wet peachy porridge following administration of the InsI5 preparation with free C-terminal acid. Consumption in the vehicle-treated groups was higher than in the wet mash groups (A and B), suggesting that this might be even more palatable. The apparent difference in potency compared with experiments in A or B is most likely attributable to reduced adsorption by the addition of 0.5% mouse albumin and use of siliconized glassware. In all experiments (A–C), InsI5 (dose given as  $\mu\text{g}$  per 25 g of body weight) caused an increase in food intake (two-way ANOVA with time and dose as factor,  $P < 0.001$ ,  $n \geq 6$ ). Data are represented as mean  $\pm$  SEM. (D) The effect of AB-mediated neutralization of endogenous InsI5 is abrogated in receptor-deficient mice: Wild-type or *Rxfp4*<sup>-/-</sup> mice were treated as described in Fig. 4C with 50  $\mu\text{g}$  of anti-InsI5 antibody (black bars) or rabbit normal serum (white bars). InsI5 Ab resulted in a reduced food intake in wild-type but not *Rxfp4*<sup>-/-</sup> mice ( $P < 0.001$ , GLM for repeated measures,  $n = 5$ ; Tukey HSD post hoc:  $P < 0.001$  for the wild-type group treated with anti-InsI5 Ab vs. all other groups). Data are presented as mean  $\pm$  95% CI.

1. Belgi A, et al. (2011) Structure and function relationship of murine insulin-like peptide 5 (INSI5): free C-terminus is essential for RXFP4 receptor binding and activation. *Biochemistry* 50(39):8352–8361.
